# Supplementary material for: Clinical Course and Outcomes of Cardiogenic Shock in COVID-19 : Insights from COVID-19 Critical Care Consortium
Source: Research Square preprint supplement (doi:10.21203/rs.3.rs-7096750/v1), 2025-09-25
Supplement: Supplementary file 1 [file e156fc3bbd79fd5d5f4b4ea3.docx]

**Clinical Course and Outcomes of Cardiogenic Shock in COVID-19**

**: Insights from the COVID-19 Critical Care Consortium**

**Table 1. Baseline Characteristics**

Median and interquartile range: n; median (IQR). The number in parentheses represents the percentage (%).

|  | **All patients**  **n=780** | **No CS**  **n=706** | **CS**  **n=74** |
| --- | --- | --- | --- |
| Age (median [IQR]) | 58.0 [48.0-67.0] | 58.0 [48.0-67.0] | 60.0 [49.0-66.0] |
| Female (%) | 299.0 (38.3) | 273.0 (38.7) | 26.0 (35.1) |
| BMI kg/m (median [IQR]) | 28.7 [24.8-33.2] | 28.9 [24.8-33.2] | 28.6 [25.1-34.7] |
| **Ethnicity** | | | |
| Aboriginal (%) | 9.0 (1.2) | 9.0 (1.3) | 0.0 (0.0) |
| Asian (%) | 270.0 (34.6) | 248.0 (35.1) | 22.0 (29.7) |
| Arab (%) | 109.0 (14.0) | 103.0 (14.6) | 6.0 (8.1) |
| Black (%) | 52.0 (6.7) | 46.0 (6.5) | 6.0 (8.1) |
| White (%) | 252.0 (32.3) | 219.0 (31.0) | 33.0 (44.6) |
| Other (%) | 33 (4.2) | 27 (3.8) | 6 (8.1) |
| **Geographic Region** | | | |
| Africa (%) | 17 (2.2) | 16 (2.3) | 1 (1.4) |
| Asia (%) | 352 (45.1) | 326 (46.2) | 26 (35.1) |
| Europe (%) | 62 (7.9) | 60 (8.5) | 2 (2.7) |
| Latin America and the Caribbean (%) | 60 (7.7) | 39 (5.5) | 21 (28.4) |
| Northern America (%) | 289 (37.1) | 265 (37.5) | 24 (32.4) |
| **Admission Era** | | | |
| 2020 (%) | 457 (58.6) | 403 (57.1) | 54 (73.0) |
| 2021 (%) | 319 (40.9) | 299 (42.4) | 20 (27.0) |
| 2022 (%) | 4 (0.5) | 4 (0.6) | 0 (0.0) |
| **Existing Comorbidities** | | | |
| Smoking (%) | 159 (20.4) | 137 (19.4) | 22 (29.7) |
| Diabetes (%) | 243 (31.2) | 216 (30.6) | 27 (36.5) |
| Hypertension (%) | 421 (54.0) | 380 (53.8) | 41 (55.4) |
| Chronic pulmonary disease (%) | 64 (8.2) | 58 (8.2) | 6 (8.1) |
| Chronic kidney disease (%) | 117 (15.0) | 105 (14.9) | 12 (16.2) |
| Malignant neoplasm (%) | 24 (3.1) | 23 (3.3) | 1 (1.4) |
| **Medication** | | | |
| Calcium channel blocker (%) | 69 (8.8) | 68 (9.6) | 1 (1.4) |
| Beta-blocker (%) | 101 (12.9) | 94 (13.3) | 7 (9.5) |
| ACEi/ARB (%) | 92 (11.8) | 83 (11.8) | 9 (12.2) |
| Diuretic (%) | 97 (12.4) | 88 (12.5) | 9 (12.2) |
| **Cardiac Disease History** | | | |
| Ischemic heart disease (%) | 158 (20.3) | 141 (20.0) | 17 (23.0) |
| Congestive heart failure (%) | 131 (16.8) | 112 (15.9) | 19 (25.7) |
| Ventricular arrhythmia (%) | 71 (9.1) | 59 (8.4) | 12 (16.2) |
| Previously implanted device (%) | 13 (1.7) | 9 (1.3) | 4 (5.4) |
| Congenital heart disease (%) | 13 (1.7) | 12 (1.7) | 1 (1.4) |
| Pre-existing cardiomyopathy (%) | 22 (2.8) | 17 (2.4) | 5 (6.8) |
| Presence of prosthetic valve (%) | 3 (0.4) | 2 (0.3) | 1 (1.4) |
| Recent ACS (within 6 months) (%) | 54 (6.9) | 46 (6.5) | 8 (10.8) |
| **Vaccination** | | | |
| One or more doses received (%) | 103 (13.2) | 95 (13.5) | 8 (10.8) |

CS, cardiogenic shock; IQR, interquartile range; BMI, body mass index; ACEi, angiotensin-converting enzyme inhibitor; ARB, angiotensin receptor blocker, ACS, acute coronary syndrome.

**Table 2. Treatment During ICU Stay**

The number in parentheses represents the percentage (%).

|  | **All patients**  **n=780** | **No CS**  **n=706** | **CS**  **n=74** |
| --- | --- | --- | --- |
| ≥2 vasoactive agents (%) | 77 (9.9) | 64 (9.1) | 13 (17.6) |
| Mechanical ventilation (%) | 472 (60.5) | 414 (58.6) | 58 (78.4) |
| Renal replacement therapy (%) | 74 (9.5) | 62 (8.8) | 12 (16.2) |
| **ECMO** | | | |
| V-V ECMO | 175 (22.4) | 154 (21.8) | 21 (28.4) |
| V-A ECMO | 6 (0.8) | 1 (0.1) | 5 (6.8) |
| Conversion V-V → V-A | 2 (0.3) | 0 (0.0) | 2 (2.7) |
| Dual lumen  + single cannula V-V ECMO | 20 (2.6) | 20 (2.8) | 0 (0.0) |
| **Cardiac assist device** | | | |
| mAFP | 1 (0.1) | 0 (0.0) | 1 (1.4) |
| IABP | 4 (0.5) | 0 (0.0) | 4 (5.4) |

Among patients with CS, V-A ECMO was used in 5 patients, mAFP in 1 patient, and IABP in 4 patients. The single mAFP case and 1 of the 4 IABP cases also received V-A ECMO therapy. Overall, 8 patients underwent MCS. The breakdown is as follows:

• V-A ECMO alone: n=3

• V-A ECMO + mAFP: n=1

• V-A ECMO + IABP: n=1

• IABP alone: n=3

CS, cardiogenic shock; ECMO, extracorporeal membrane oxygenation; V-V, venovenous; V-A, venoarterial; mAFP, micro axial flow pump; IABP, intra-aortic balloon pumping.

**Table 3. Complications During ICU Stay**

The number in parentheses represents the percentage (%).

|  | **All patients**  **n=780** | **No CS**  **n=706** | **CS**  **n=74** |
| --- | --- | --- | --- |
| **Cardiac complication** | | | |
| AMI | 78 (10.0) | 64 (9.1) | 14 (18.9) |
| Congestive HF | 130 (16.7) | 104 (14.7) | 26 (35.1) |
| Cardiac arrhythmia | 168 (21.5) | 125 (17.7) | 43 (58.1) |
| Myocarditis/Pericarditis | 7 (0.9) | 1 (0.1) | 6 (8.1) |
| Endocarditis | 7 (0.9) | 6 (0.8) | 1 (1.4) |
| Takotsubo syndrome | 1 (0.1) | 0 (0.0) | 1 (1.4) |
| **Other organ complications** | | | |
| ARDS | 501 (64.2) | 441 (62.5) | 60 (81.1) |
| Pulmonary embolism | 39 (5.0) | 35 (5.0) | 4 (5.4) |
| Pleural effusion | 145 (18.6) | 123 (17.4) | 22 (29.7) |
| Stroke/CVA | 22 (2.8) | 20 (2.8) | 2 (2.7) |
| Meningitis/Encephalitis | 5 (0.6) | 4 (0.6) | 1 (1.4) |
| AKI | 353 (45.3) | 298 (42.2) | 55 (74.3) |
| Liver dysfunction | 74 (9.5) | 65 (9.2) | 9 (12.2) |
| Coagulation disorder/DIC | 97 (12.4) | 80 (11.3) | 17 (23.0) |
| Bacteremia | 165 (21.2) | 133 (18.8) | 32 (43.2) |
| Hemorrhage | 64 (8.2) | 52 (7.4) | 12 (16.2) |

CS, cardiogenic shock; AMI, acute myocardium infarction; HF, heart failure; ARDS, acute respiratory distress syndrome; CVA, cerebrovascular accident; DIC, disseminated intravascular coagulation; AKI, acute kidney injury.

**Table 4. Multivariable Logistic Regression Output for Cardiogenic Shock with Site and Era as Random Effects**

| **Parameter** | **OR** | **95% CI** | **P value** |
| --- | --- | --- | --- |
| Age, years | 0.99 | 0.97 - 1.02 | 0.616 |
| Female | 0.92 | 0.49 - 1.73 | 0.798 |
| Unvaccinated | 1.07 | 0.55 - 2.09 | 0.850 |
| Known Ischemic Heart Disease | 0.88 | 0.33 - 2.40 | 0.807 |
| Known Congestive HF | 0.77 | 0.29 - 2.04 | 0.591 |
| Known Arrhythmia (VT/VF) | 3.89 | 1.60 - 9.47 | 0.003 |
| Recent ACS (within 6 months) | 2.96 | 0.94 - 9.28 | 0.063 |

OR, odds ratio; CI, confidence interval: HF, heart failure; VT, ventricular tachycardia; VF, ventricular fibrillation; ACS, acute coronary syndrome.
